# Supplementary material for: Contextual factors influencing physicians’ perception of antibiotic prescribing in primary care in Germany — a prospective observational study
Source: Springer Nature journal article supplement (doi:10.1186/s12913-022-07701-3), 2022-03-12
Supplement: MOESM3 [file 20213466]

## Additional file 3

### Overview and Reliability of the mean score variables

#### a. PCN environment

##### *Reliability Statistics*

| Cronbach's Alpha | N of Items | N   |
|------------------|------------|-----|
| 0.898            | 11         | 224 |

##### *Item-Total Statistics*

|                                                                                               | Scale Mean if Item Deleted | Scale Variance if Item Deleted | Corrected Item-Total Correlation | Cronbach's Alpha if Item Deleted |
|-----------------------------------------------------------------------------------------------|----------------------------|--------------------------------|----------------------------------|----------------------------------|
| <b>Participating in the network ...</b>                                                       |                            |                                |                                  |                                  |
| ... motivates guideline-oriented patient care                                                 | 39.38                      | 52.51                          | 0.73                             | 0.882                            |
| ... supports shared-decision making                                                           | 39.64                      | 51.63                          | 0.71                             | 0.883                            |
| ... supports managing patient expectations regarding the prescription on antibiotics          | 39.63                      | 52.02                          | 0.71                             | 0.884                            |
| ... supports implementing new routines                                                        | 39.31                      | 53.08                          | 0.69                             | 0.885                            |
| ... has an impact on my antibiotic prescribing decisions                                      | 40.13                      | 52.30                          | 0.58                             | 0.894                            |
| <b>In my primary care network</b>                                                             |                            |                                |                                  |                                  |
| ... antibiotics therapy is discussed                                                          | 38.74                      | 58.99                          | 0.48                             | 0.896                            |
| ... peer exchange about guideline-oriented antibiotics therapy is offered                     | 39.07                      | 55.54                          | 0.65                             | 0.888                            |
| ... exchange about antibiotic prescribing routines for non-complicated infections is possible | 39.24                      | 54.52                          | 0.63                             | 0.888                            |
| ... there are conventions about antibiotics for non-complicated infections                    | 39.38                      | 53.20                          | 0.65                             | 0.887                            |
| ... training on guideline-oriented antibiotics therapy is offered                             | 38.76                      | 57.55                          | 0.54                             | 0.893                            |
| ... I participated in training on guideline-oriented antibiotics therapy                      | 38.81                      | 56.70                          | 0.57                             | 0.892                            |

**b. Structural conditions**

*Reliability Statistics*

| <b>Cronbach's Alpha</b> | <b>N of Items</b> | <b>N</b> |
|-------------------------|-------------------|----------|
| 0.921                   | 6                 | 221      |

*Item-Total Statistics*

| <b>Structural conditions (teams, rooms)</b>                                               | <b>Scale Mean if Item Deleted</b> | <b>Scale Variance if Item Deleted</b> | <b>Corrected Item-Total Correlation</b> | <b>Cronbach's Alpha if Item Deleted</b> |
|-------------------------------------------------------------------------------------------|-----------------------------------|---------------------------------------|-----------------------------------------|-----------------------------------------|
| ... motivate me to treat patients increasingly guideline-based                            | 14.61                             | 29.49                                 | 0.82                                    | 0.901                                   |
| ... support me in taking shared therapy decisions with the patients                       | 14.48                             | 29.25                                 | 0.87                                    | 0.893                                   |
| ... support me in handling patient expectations regarding the prescription of antibiotics | 14.53                             | 29.33                                 | 0.89                                    | 0.891                                   |
| ... are helpful when implementing new routines in the practice                            | 14.12                             | 31.68                                 | 0.75                                    | 0.910                                   |
| ... impact the amount of time available to me per patient                                 | 14.18                             | 32.82                                 | 0.61                                    | 0.929                                   |
| ... impact my decision to prescribe antibiotics                                           | 15.06                             | 31.24                                 | 0.72                                    | 0.915                                   |

**c. Environment of existing processes**

*Reliability Statistics*

| <b>Cronbach's Alpha</b> | <b>N of Items</b> | <b>N</b> |
|-------------------------|-------------------|----------|
| 0.907                   | 6                 | 224      |

**Item-Total Statistics**

|                                                                                                  | <b>Scale<br/>Mean if<br/>Item<br/>Deleted</b> | <b>Scale<br/>Variance if<br/>Item<br/>Deleted</b> | <b>Corrected<br/>Item-Total<br/>Correlation</b> | <b>Cronbach's<br/>Alpha if<br/>Item<br/>Deleted</b> |
|--------------------------------------------------------------------------------------------------|-----------------------------------------------|---------------------------------------------------|-------------------------------------------------|-----------------------------------------------------|
| <b>Existing processes and organizing<br/>processes in the practice ...</b>                       |                                               |                                                   |                                                 |                                                     |
| ... motivate guideline-oriented patient<br>care                                                  | 16.43                                         | 23.35                                             | 0.82                                            | 0.879                                               |
| ... support me in taking a shared the<br>therapy decision with the patients                      | 16.29                                         | 23.73                                             | 0.85                                            | 0.875                                               |
| ... supports me in managing patient<br>expectations regarding the prescription<br>of antibiotics | 16.42                                         | 23.44                                             | 0.86                                            | 0.873                                               |
| ... are helpful with implementing new<br>routines in the practice                                | 16.06                                         | 25.39                                             | 0.72                                            | 0.894                                               |
| ... impact the amount of time available<br>to me per patient                                     | 16.16                                         | 25.78                                             | 0.56                                            | 0.917                                               |
| ... impact my decision to prescribe<br>antibiotics                                               | 17.04                                         | 23.67                                             | 0.69                                            | 0.900                                               |

**d. External defined general conditions**

**Reliability Statistics**

| <b>Cronbach's<br/>Alpha</b> | <b>N of<br/>Items</b> | <b>N</b> |
|-----------------------------|-----------------------|----------|
| 0.890                       | 6                     | 224      |

**Item-Total Statistics**

|                                                                             | <b>Scale<br/>Mean if<br/>Item<br/>Deleted</b> | <b>Scale<br/>Variance if<br/>Item<br/>Deleted</b> | <b>Corrected<br/>Item-Total<br/>Correlatio<br/>n</b> | <b>Cronbach's<br/>Alpha if<br/>Item<br/>Deleted</b> |
|-----------------------------------------------------------------------------|-----------------------------------------------|---------------------------------------------------|------------------------------------------------------|-----------------------------------------------------|
| <b>External defined general<br/>conditions...</b>                           |                                               |                                                   |                                                      |                                                     |
| ... motivate guideline-oriented patient<br>care                             | 13.16                                         | 22.41                                             | 0.74                                                 | 0.865                                               |
| ... support me in taking a shared the<br>therapy decision with the patients | 13.35                                         | 21.30                                             | 0.83                                                 | 0.851                                               |
| ... supports me in managing patient                                         | 13.4                                          | 21.29                                             | 0.84                                                 | 0.849                                               |

|                                                                |       |       |      |       |
|----------------------------------------------------------------|-------|-------|------|-------|
| expectations regarding the prescription of antibiotics         |       |       |      |       |
| ... are helpful with implementing new routines in the practice | 13.34 | 22.24 | 0.76 | 0.863 |
| ... impact the amount of time available to me per patient      | 13.22 | 25.21 | 0.35 | 0.930 |
| ... impact my decision to prescribe antibiotics                | 13.62 | 21.47 | 0.80 | 0.857 |
