# Supplementary material for: Contextual factors influencing physicians’ perception of antibiotic prescribing in primary care in Germany — a prospective observational study
Source: Springer Nature journal article supplement (doi:10.1186/s12913-022-07701-3), 2022-03-12
Supplement: MOESM4 [file 20213466]

## Additional file 4

### Missing value analysis

#### *Univariate Statistics*

|                                                                                           | N   | Mean  | SD   | Missing |         | No. Of Extremes <sup>a</sup> |      |
|-------------------------------------------------------------------------------------------|-----|-------|------|---------|---------|------------------------------|------|
|                                                                                           |     |       |      | Count   | Percent | Low                          | High |
| work_experience_year_T0                                                                   | 151 | 25.91 | 7.99 | 1       | 0.7     | 0                            | 1    |
| age_T0                                                                                    | 147 | 54.81 | 7.50 | 5       | 3.3     | 3                            | 0    |
| sex_T0                                                                                    | 149 | 0.67  | 0.47 | 3       | 2.0     | 0                            | 0    |
| medical_speciality_T0                                                                     | 150 | 1.89  | 1.63 | 2       | 1.3     | 0                            | 15   |
| patient_quantity_T0                                                                       | 140 |       |      | 12      | 7.9     |                              |      |
| practice_area_T0                                                                          | 150 |       |      | 2       | 1.3     |                              |      |
| <b>Structural conditions</b>                                                              |     |       |      |         |         |                              |      |
| structure_guide_T0                                                                        |     |       |      |         |         |                              |      |
| ... motivate me to treat patients increasingly guideline-based                            | 149 |       |      | 3       | 2.0     |                              |      |
| structure_involve_T0                                                                      |     |       |      |         |         |                              |      |
| ... support me in taking shared therapy decisions with the patients                       | 151 |       |      | 1       | 0.7     |                              |      |
| structure_expect_T0                                                                       |     |       |      |         |         |                              |      |
| ... support me in handling patient expectations regarding the prescription of antibiotics | 151 |       |      | 1       | 0.7     |                              |      |
| structure_change_T0                                                                       |     |       |      |         |         |                              |      |
| ... are helpful when implementing new routines in the practice                            | 150 |       |      | 2       | 1.3     |                              |      |
| structure_time_T0                                                                         |     |       |      |         |         |                              |      |
| ... impact the amount of time available to me per patient                                 | 151 |       |      | 1       | 0.7     |                              |      |
| structure_impact_T0                                                                       |     |       |      |         |         |                              |      |
| ... impact my decision to prescribe antibiotics                                           | 151 |       |      | 1       | 0.7     |                              |      |
| <b>Existing processes and organizing processes in the practice ...</b>                    |     |       |      |         |         |                              |      |
| orga_guide_T0                                                                             |     |       |      |         |         |                              |      |
| ... motivate guideline-oriented patient care                                              | 151 |       |      | 1       | 0.7     |                              |      |

|                                                                                            |     |  |  |   |     |  |  |
|--------------------------------------------------------------------------------------------|-----|--|--|---|-----|--|--|
| orga_involve_T0                                                                            |     |  |  |   |     |  |  |
| ... support me in taking a shared the therapy decision with the patients                   | 151 |  |  | 1 | 0.7 |  |  |
| orga_expect_T0                                                                             |     |  |  |   |     |  |  |
| ... supports me in managing patient expectations regarding the prescription of antibiotics | 151 |  |  | 1 | 0.7 |  |  |
| orga_change_T0                                                                             |     |  |  |   |     |  |  |
| ... are helpful with implementing new routines in the practice                             | 151 |  |  | 1 | 0.7 |  |  |
| orga_time_T0                                                                               |     |  |  |   |     |  |  |
| ... impact the amount of time available to me per patient                                  | 151 |  |  | 1 | 0.7 |  |  |
| orga_impact_T0                                                                             |     |  |  |   |     |  |  |
| ... impact my decision to prescribe antibiotics                                            | 151 |  |  | 1 | 0.7 |  |  |
| <b>External defined general conditions ...</b>                                             |     |  |  |   |     |  |  |
| regulation_guide_T0                                                                        |     |  |  |   |     |  |  |
| ... motivate guideline-oriented patient care                                               | 151 |  |  | 1 | 0.7 |  |  |
| regulation_decision_T0                                                                     |     |  |  |   |     |  |  |
| ... support me in taking a shared the therapy decision with the patients                   | 152 |  |  | 0 | 0   |  |  |
| regulation_expect_T0                                                                       |     |  |  |   |     |  |  |
| ... supports me in managing patient expectations regarding the prescription of antibiotics | 152 |  |  | 0 | 0   |  |  |
| regualtion_change_T0                                                                       |     |  |  |   |     |  |  |
| ... are helpful with implementing new routines in the practice                             | 152 |  |  | 0 | 0   |  |  |
| regulation_time_T0                                                                         |     |  |  |   |     |  |  |
| ... impact the amount of time available to me per patient                                  | 152 |  |  | 0 | 0   |  |  |
| regulation_impact_T0                                                                       |     |  |  |   |     |  |  |
| ... impact my decision to prescribe antibiotics                                            | 151 |  |  | 1 | 0.7 |  |  |

| <b>Participating in the network ...</b>                                                       |     |  |  |   |     |  |  |
|-----------------------------------------------------------------------------------------------|-----|--|--|---|-----|--|--|
| PCN_guide_T0                                                                                  |     |  |  |   |     |  |  |
| ... motivates guideline-oriented patient care                                                 | 152 |  |  | 0 | 0   |  |  |
| PCN_involve_T0                                                                                | 152 |  |  | 0 | 0   |  |  |
| ... supports shared-decision making                                                           |     |  |  |   |     |  |  |
| PCN_expect_T0                                                                                 | 152 |  |  | 0 | 0   |  |  |
| ... supports managing patient expectations regarding the prescription on antibiotics          |     |  |  |   |     |  |  |
| PCN_change_T0                                                                                 | 152 |  |  | 0 | 0   |  |  |
| ... supports implementing new routines                                                        |     |  |  |   |     |  |  |
| PCN_impact_T0                                                                                 | 151 |  |  | 1 | 0.7 |  |  |
| ... has an impact on my antibiotic prescribing decisions                                      |     |  |  |   |     |  |  |
| <b>In my primary care network</b>                                                             |     |  |  |   |     |  |  |
| PCN_subject_T0                                                                                | 152 |  |  | 0 | 0   |  |  |
| ... antibiotics therapy is discussed                                                          |     |  |  |   |     |  |  |
| PCN_exchange_gen_T0                                                                           | 152 |  |  | 0 | 0   |  |  |
| ... peer exchange about guideline-oriented antibiotics therapy is offered                     |     |  |  |   |     |  |  |
| PCN_exchange_specif_T0                                                                        | 152 |  |  | 0 | 0   |  |  |
| ... exchange about antibiotic prescribing routines for non-complicated infections is possible |     |  |  |   |     |  |  |
| PCN_agreement_T0                                                                              | 152 |  |  | 0 | 0   |  |  |
| ... there are conventions about antibiotics for non-complicated infections                    |     |  |  |   |     |  |  |
| PCN_training_T0                                                                               | 151 |  |  | 1 | 0.7 |  |  |
| ... training on guideline-oriented antibiotics therapy is offered                             |     |  |  |   |     |  |  |
| PCN_training_used_T0                                                                          | 151 |  |  | 1 | 0.7 |  |  |
| ... I participated in training on guideline-oriented antibiotics therapy                      |     |  |  |   |     |  |  |

<sup>a</sup> Number of cases outside the range (Q1 – 1.5\*IQR, Q3 + 1.5\*IQR).

*EM-Correlation<sup>a</sup>*

|                         | work_experience_year_T0 | age_T0 | sex_T0 | medical_speciality_T0 |
|-------------------------|-------------------------|--------|--------|-----------------------|
| work_experience_year_T0 | 1                       |        |        |                       |
| age_T0                  | 0.922                   | 1      |        |                       |
| sex_T0                  | 0.12                    | 0.112  | 1      |                       |
| medical_speciality_T0   | 0.011                   | 0      | 0.209  | 1                     |

<sup>a</sup> Little's MCAR test: Chi-Square = 13.741, DF = 10, Sig. = .185
