# Supplementary material for: Contextual factors influencing physicians’ perception of antibiotic prescribing in primary care in Germany — a prospective observational study
Source: Springer Nature journal article supplement (doi:10.1186/s12913-022-07701-3), 2022-03-12
Supplement: MOESM5 [file 20213466]

## Additional file 5

### 1 Results intervention arm comparison (Sample T0)

| Variables                                          | Total<br>N (%) | Interven-<br>tion arm<br>I<br>n (%) | Interven-<br>tion arm<br>II<br>n (%) | Interven-<br>tion arm<br>III<br>n (%) | Test                | P value |
|----------------------------------------------------|----------------|-------------------------------------|--------------------------------------|---------------------------------------|---------------------|---------|
| <b>PIP-ARena</b>                                   | 183            | 68                                  | 66                                   | 49                                    |                     |         |
| PIP-ARena                                          | 126<br>(68.9)  | 47 (69.1)                           | 46 (69.7)                            | 33 (67.3)                             | 0.076 <sup>a</sup>  | 0.963   |
| No PIP-ARena                                       | 57 (31.1)      | 21 (30.9)                           | 20 (30.3)                            | 16 (32.7)                             |                     |         |
| <b>Individual characteristics</b>                  |                |                                     |                                      |                                       |                     |         |
| <b>Sex</b>                                         | 224            | 73                                  | 73                                   | 78                                    | 5.245 <sup>a</sup>  | 0.073   |
| Female                                             | 76 (33.9)      | 18 (24.7)                           | 25 (34.2)                            | 33 (42.3)                             |                     |         |
| Male                                               | 148<br>(66.1)  | 55 (75.3)                           | 48 (65.8)                            | 45 (57.7)                             |                     |         |
| <b>Work experience</b>                             | 228            | 76                                  | 72                                   | 80                                    | 1.320 <sup>b</sup>  | 0.517   |
| in years, mean (SD)                                | 25.5 (7.9)     | 25.8 (7.3)                          | 25.8 (8.6)                           | 24.9 (8.0)                            |                     |         |
| <b>Medical speciality</b>                          | 227            | 76                                  | 71                                   | 80                                    | 0.210 <sup>a</sup>  | 0.900   |
| GP                                                 | 132<br>(58.1)  | 44 (57.9)                           | 40 (56.3)                            | 48 (60.0)                             |                     |         |
| Specialists                                        | 95 (41.9)      | 32 (42.1)                           | 31 (43.7)                            | 32 (40.0)                             |                     |         |
| <b>PCN environment</b>                             | 224            | 73                                  | 72                                   | 79                                    | 6.499 <sup>b</sup>  | 0.039   |
| Mean (SD)                                          | 3.9 (0.7)      | 3.8 (0.7)                           | 4.1 (0.7)                            | 3.9 (0.8)                             |                     |         |
| <b>General characteristics of medical practice</b> |                |                                     |                                      |                                       |                     |         |
| <b>Number of patients per quarter of year</b>      | 214            | 74                                  | 61                                   | 79                                    | 0.297 <sup>a</sup>  | 0.862   |
| < 1,000 patients                                   | 34 (13.0)      | 11 (14.9)                           | 11 (18.0)                            | 12 (15.9)                             |                     |         |
| > 1,000 patients                                   | 180 (67)       | 63 (85.1)                           | 50 (82.0)                            | 67 (84.8)                             |                     |         |
| <b>Practice area</b>                               | 227            | 76                                  | 73                                   | 78                                    | 66.251 <sup>a</sup> | < 0.001 |
| < 100,000 population                               | 141<br>(52.4)  | 68 (89.5)                           | 19 (26.0)                            | 54 (69.2)                             |                     |         |
| > 100,000 population                               | 86 (32.0)      | 8 (10.5)                            | 54 (74.0)                            | 24 (30.8)                             |                     |         |
| <b>Structural conditions</b>                       | 221            | 72                                  | 71                                   | 78                                    | 0.360 <sup>b</sup>  | 0.835   |
| Mean (SD)                                          | 2.9 (1.1)      | 2.8 (1.2)                           | 3.0 (1.1)                            | 2.9 (1.0)                             |                     |         |
| <b>Environment of existing processes</b>           | 224            | 74                                  | 72                                   | 78                                    | 0.510 <sup>b</sup>  | 0.775   |
| Mean (SD)                                          | 3.3 (1.0)      | 3.2 (1.0)                           | 3.4 (1.0)                            | 3.3 (0.9)                             |                     |         |
| <b>External defined general conditions</b>         | 224            | 74                                  | 73                                   | 77                                    | 0.383 <sup>b</sup>  | 0.826   |
| Mean SD                                            | 2.7 (0.9)      | 2.7 (1.0)                           | 2.7 (1.0)                            | 2.7 (0.9)                             |                     |         |

<sup>a</sup>= Chi<sup>2</sup> ; <sup>b</sup>= Kruskal-Wallis Test

PIP-ARena = perceived impact of participation in the ARena project on the decision-making regarding antibiotic prescribing; GP = General Practitioner; PCN = primary care network; SD = Standard deviation

## 2 Results intervention arm comparison (Sample T0/T2)

| Variables                                          | Total<br>N (%) | Interven<br>tion arm<br>I<br>n (%) | Interven<br>tion arm<br>II<br>n (%) | Interven<br>tion arm<br>III<br>n (%) | Test                | P value |
|----------------------------------------------------|----------------|------------------------------------|-------------------------------------|--------------------------------------|---------------------|---------|
| <b>PIP-ARena</b>                                   | 151            | 50                                 | 57                                  | 44                                   |                     |         |
| PIP-ARena                                          | 108<br>(71.5)  | 39 (78.0)                          | 40 (70.2)                           | 29 (65.9)                            | 1.762 <sup>a</sup>  | 0.414   |
| No PIP-ARena                                       | 43 (28.5)      | 11 (22.0)                          | 17 (29.8)                           | 15 (34.1)                            |                     |         |
| <b>Individual characteristics</b>                  |                |                                    |                                     |                                      |                     |         |
| <b>Sex</b>                                         | 149            | 49                                 | 58                                  | 42                                   | 2.879 <sup>a</sup>  | 0.237   |
| Female                                             | 49 (32.9)      | 13 (26.5)                          | 18 (31.0)                           | 18 (42.9)                            |                     |         |
| Male                                               | 100<br>(67.1)  | 36 (73.5)                          | 40 (69.0)                           | 24 (57.1)                            |                     |         |
| <b>Work experience</b>                             | 151            | 50                                 | 57                                  | 44                                   | 0.368 <sup>b</sup>  | 0.832   |
| in years, mean (SD)                                | 25.9 (8.0)     | 25.3 (7.0)                         | 26.2 (8.6)                          | 26.3 (8.4)                           |                     |         |
| <b>Medical speciality</b>                          | 150            | 50                                 | 56                                  | 44                                   | 0.588 <sup>a</sup>  | 0.745   |
| GP                                                 | 90 (60.0)      | 28 (56.0)                          | 34 (60.7)                           | 28 (63.6)                            |                     |         |
| Specialists                                        | 60 (40.0)      | 22 (44.0)                          | 22 (39.3)                           | 16 (36.4)                            |                     |         |
| <b>PCN environment</b>                             | 149            | 48                                 | 57                                  | 44                                   | 6.601 <sup>b</sup>  | 0.037   |
| Mean (SD)                                          | 4.0 (0.7)      | 3.8 (0.7)                          | 4.1 (0.7)                           | 3.9 (0.8)                            |                     |         |
| <b>General characteristics of medical practice</b> |                |                                    |                                     |                                      |                     |         |
| <b>Number of patients per quarter of year</b>      | 140            | 49                                 | 48                                  | 43                                   | 1.034 <sup>a</sup>  | 0.596   |
| < 1,000 patients                                   | 23 (16.4)      | 7 (14.3)                           | 10 (20.8)                           | 6 (14.0)                             |                     |         |
| > 1,000 patients                                   | 117<br>(83.6)  | 42 (85.7)                          | 38 (79.2)                           | 37 (86.0)                            |                     |         |
| <b>Practice area</b>                               | 150            | 50                                 | 58                                  | 42                                   | 48.987 <sup>a</sup> | < 0.001 |
| < 100,000 population                               | 99 (66.0)      | 47 (94.0)                          | 19 (32.8)                           | 33 (78.6)                            |                     |         |
| > 100,000 population                               | 51 (34.0)      | 3 (6.0)                            | 39 (69.2)                           | 9 (21.4)                             |                     |         |
| <b>Structural conditions</b>                       | 148            | 48                                 | 56                                  | 44                                   | 0.431 <sup>b</sup>  | 0.806   |
| Mean (SD)                                          | 2.9 (1.1)      | 2.8 (1.2)                          | 3.0 (1.2)                           | 2.9 (0.9)                            |                     |         |
| <b>Environment of existing processes</b>           | 151            | 50                                 | 57                                  | 44                                   | 0.401 <sup>b</sup>  | 0.818   |
| Mean (SD)                                          | 3.3 (1.0)      | 3.3 (1.0)                          | 3.3 (1.0)                           | 3.2 (0.9)                            |                     |         |
| <b>External defined general conditions</b>         | 150            | 49                                 | 58                                  | 43                                   | 0.210 <sup>b</sup>  | 0.900   |
| Mean SD                                            | 2.7 (0.9)      | 2.6 (1.0)                          | 2.7 (0.9)                           | 2.7 (0.8)                            |                     |         |

<sup>a</sup>= Chi<sup>2</sup>; <sup>b</sup>= Kruskal-Wallis Test

PIP-ARena = perceived impact of participation in the ARena project on the decision-making regarding antibiotic prescribing; GP = General Practitioner; PCN = primary care network; SD = Standard deviation
