# Supplementary material for: Contextual factors influencing physicians’ perception of antibiotic prescribing in primary care in Germany — a prospective observational study
Source: Springer Nature journal article supplement (doi:10.1186/s12913-022-07701-3), 2022-03-12
Supplement: MOESM6 [file 20213466]

## Additional file 6

### Results multivariable logistic regression analysis according to the four CICI domains

#### 1. Individual characteristics

| Variables           | B     | SE   | Wald | df | P value | OR   | CI 95%       |
|---------------------|-------|------|------|----|---------|------|--------------|
| Sex, male           | 0.40  | 0.44 | 0.82 | 1  | 0.365   | 1.49 | 0.628–3.544  |
| Experience year     | 0.05  | 0.03 | 3.75 | 1  | 0.053   | 1.06 | 0.999–1.120  |
| Med. Speciality, GP | -0.41 | 0.43 | 0.92 | 1  | 0.339   | 0.66 | 0.285–1.541  |
| Self employed       | 1.23  | 1.31 | 0.89 | 1  | 0.346   | 3.42 | 0.265–44.191 |
| Constant            | -1.72 | 1.32 | 1.69 | 1  | 0.193   | 0.18 |              |

Dependent Variable: perceived impact of participation in the ARena project on decision-making on antibiotic prescribing; GP = general practitioner

#### 2. Intervention arm allocation

| Variables | B     | SE   | Wald  | df | P value | OR   | CI 95%      |
|-----------|-------|------|-------|----|---------|------|-------------|
| Arm I     |       |      | 1.74  | 2  | 0.42    |      |             |
| Arm II    | -0.41 | 0.49 | 0.84  | 1  | 0.360   | 0.66 | 0.276–1.596 |
| Arm III   | 0.61  | 0.47 | 1.69  | 1  | 0.194   | 0.55 | 0.219–1.361 |
| Constant  | 1.27  | 0.34 | 13.74 | 1  | 0.000   | 3.55 |             |

Dependent Variable: perceived impact of participation in the ARena project on decision-making on antibiotic prescribing

#### 3. PCN environment

| Variables       | B     | SE   | Wald | df | P value | OR   | CI 95%      |
|-----------------|-------|------|------|----|---------|------|-------------|
| PCN environment | 0.72  | 0,25 | 8.22 | 1  | 0.004   | 2.06 | 1.256-3.363 |
| Constant        | -1.84 | 0.98 | 3.54 | 1  | 0.060   | 3.55 |             |

Dependent Variable: perceived impact of participation in the ARena project on decision-making on antibiotic prescribing; PCN = primary care network

#### 4. General characteristics of the medical practice

| Variables                                                 | B     | SE   | Wald | df | P value | OR   | CI 95%      |
|-----------------------------------------------------------|-------|------|------|----|---------|------|-------------|
| Number of patients per quarter of year (> 1,000 patients) | -0.05 | 0.57 | 0.01 | 1  | 0.932   | 0.95 | 0.311-2.915 |
| Practice area ( $\geq$ 100,000 population)                | -0.37 | 0.43 | 0.76 | 1  | 0.384   | 0.69 | 0.297-1.597 |
| Structural conditions                                     | 0.07  | 0.31 | 0.05 | 1  | 0.817   | 1.07 | 0.586-1.972 |
| Environment of existing processes                         | 0.32  | 0.30 | 1.10 | 1  | 0.295   | 1.37 | 0.760-2.477 |
| External defined general conditions                       | 0.20  | 0.28 | 0.52 | 1  | 0.473   | 1.22 | 0.711-2.088 |
| Constant                                                  | -0.53 | 0.92 | 0.33 | 1  | 0.568   | 0.59 |             |

Dependent Variable: perceived impact of participation in the ARena project on decision-making on antibiotic prescribing;
