# Supplementary material for: Contextual factors influencing physicians’ perception of antibiotic prescribing in primary care in Germany — a prospective observational study
Source: Springer Nature journal article supplement (doi:10.1186/s12913-022-07701-3), 2022-03-12
Supplement: MOESM7 [file 20213466]

## Additional file 7

### Results multilevel analysis

| Variables                           | Wald-CI 95% |       |        |    |         |        |       |
|-------------------------------------|-------------|-------|--------|----|---------|--------|-------|
|                                     | B           | SE    | Wald   | df | P value | lower  | upper |
| Constant                            | -3.425      | 0.671 | 26.051 | 1  | 0.000   | -4.741 | -2.11 |
| Work experience                     | 0.050       | 0.021 | 5.493  | 1  | 0.019   | 0.008  | 0.091 |
| PCN environment                     | 0.449       | 0.252 | 3.166  | 1  | 0.075   | -0.046 | 0.944 |
| Structural conditions               | 0.143       | 0.297 | 0.233  | 1  | 0.629   | -0.438 | 0.725 |
| Environment of existing processes   | 0.144       | 0.248 | 0.335  | 1  | 0.563   | -0.343 | 0.631 |
| External defined general conditions | 0.201       | 0.299 | 0.450  | 1  | 0.502   | -0.385 | 0.787 |

Dependent Variable: perceived impact of participation in the ARena project on decision-making on antibiotic prescribing
